# Supplementary material
Source: MDPI journal article supplement (https://www.mdpi.com/2079-6412/12/3/318)
Supplement: s1 [file s1]

# Supplementary Materials: Facile In situ Growth of Zif-8 Nanosheets with Enhanced Anti-Corrosion Performance for Carbon Steel in Seawater

Zhishu Zhang <sup>1</sup>, Qingjian Liu <sup>2,3,\*</sup> and Gaocan Qi <sup>4</sup>

<sup>1</sup> China National Offshore Oil Corporation (CNOOC) China Ltd. Zhanjiang, Zhanjiang 524057, China; zhangzhsh@cnooc.com.cn

<sup>2</sup> Tianjin Key Laboratory for Advanced Mechatronic System Design and Intelligent Control, School of Mechanical Engineering, Tianjin University of Technology, Tianjin 300384, China

<sup>3</sup> National Demonstration Center for Experimental Mechanical and Electrical Engineering Education, Tianjin University of Technology, Tianjin 300384, China

<sup>4</sup> Tianjin Key Lab for Photoelectric Materials & Devices, School of Materials Science and Engineering, Tianjin University of Technology, Tianjin 300384, China; gaocanqi@tjut.edu.cn

\* Correspondence: qingjian\_liu\_19840@163.com

**Citation:** Zhang, Z.; Liu, Q.; Qi, G. Facile In-Situ Growth of Zif-8 Nanosheets with Enhanced Anti-corrosion Performance for Carbon Steel in Seawater. *Coatings* **2022**, *12*, 318. [10.3390/coatings12030318](https://doi.org/10.3390/coatings12030318)

Academic Editor: Shih-Chen Shi

Received: 10 January 2022

Accepted: 25 February 2022

Published: 28 February 2022

**Publisher's Note:** MDPI stays neutral with regard to jurisdictional claims in published maps and institutional affiliations.

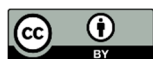

**Copyright:** © 2022 by the authors. Licensee MDPI, Basel, Switzerland. This article is an open access article distributed under the terms and conditions of the Creative Commons Attribution (CC BY) license (<http://creativecommons.org/licenses/by/4.0/>).

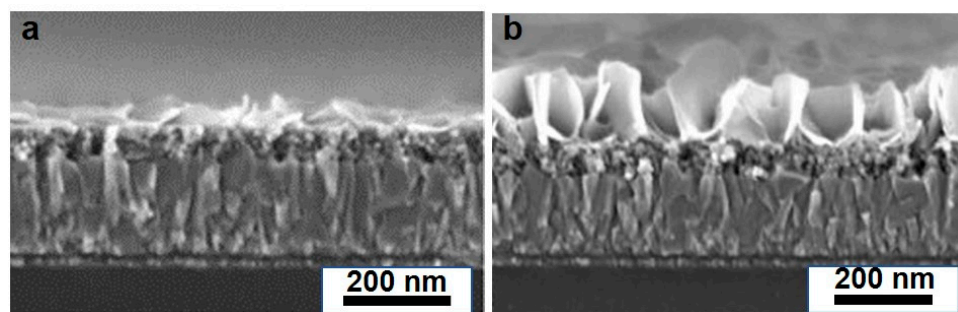

**Figure S1.** Cross sectional SEM images of the uncoated carbon steel (a) and Zif-8 coating sample (b) before immersed in seawater.

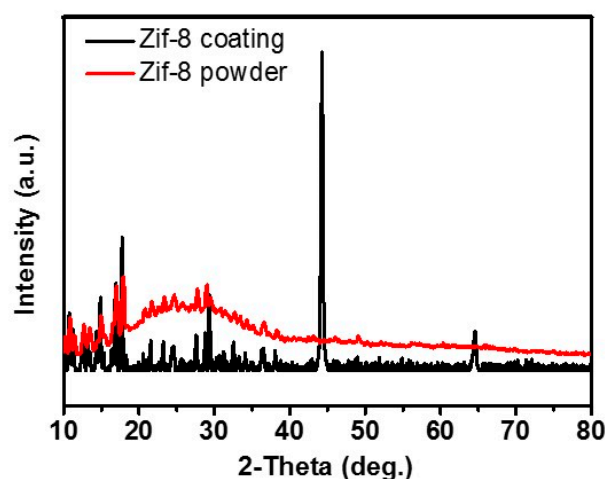

**Figure S2.** XRD patterns of the Zif-8 powder (red curve) and Zif-8 coating sample (black curve). As seen, the peaks from 10° to 40° can be ascribed to the Zif-8 phase (JPCDS #062-1030).

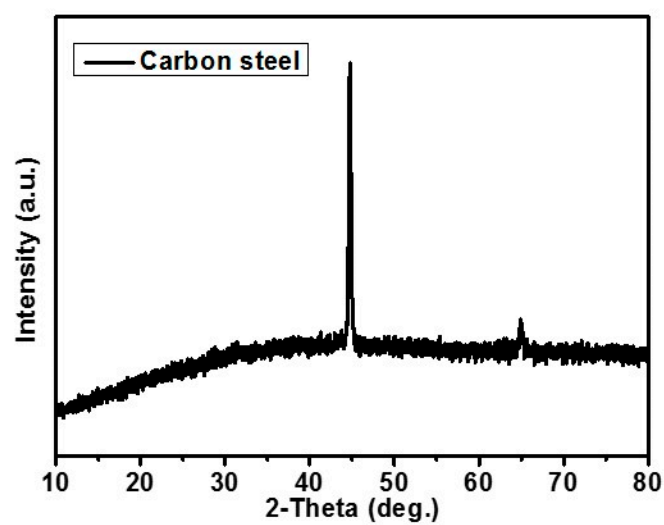

Figure S3. XRD pattern of the carbon steel support.

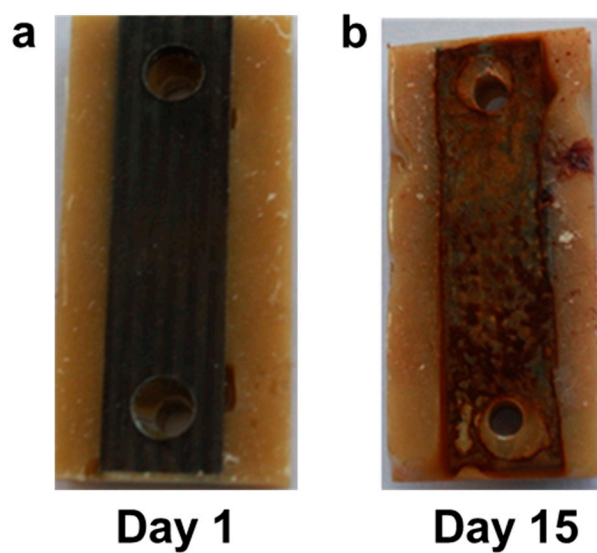

Figure S4. Photographs of the blank sample in seawater with different days.

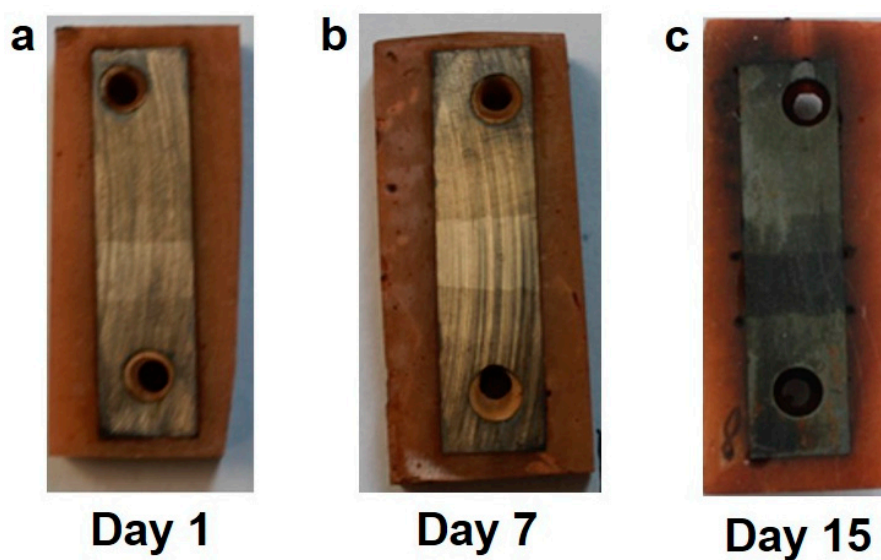

Figure S5. Photographs of the Zif-8 coating sample in seawater with different days.

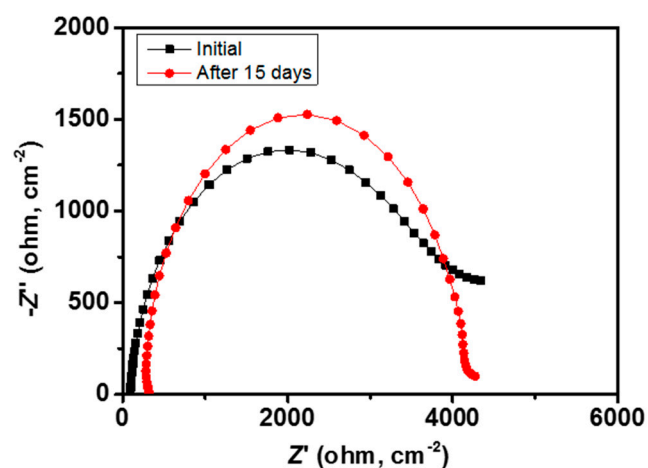

Figure S6. EIS spectra before and after long-term immersion in seawater.

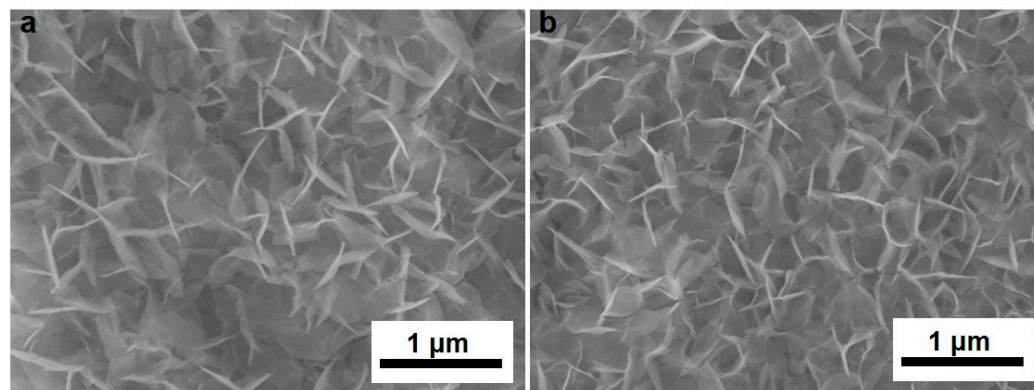

Figure S7. SEM images of the Zif-8 coating sample immersed in seawater with 7 days (a) and 15 days (b).

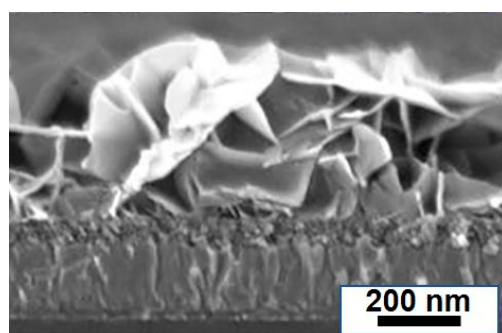

Figure S8. Cross sectional SEM image of the Zif-8 coating sample after immersed in seawater for 15 days. we speculate that some Zif-8 nanosheets seemed to fall away from the carbon steel during the long-term immersion test and then covered on the surface of Zif-8 coating film.

**Table S1.** The value of equivalent circuits for curve fitting of uncoated and Zif-8 coating samples.

| -             | $R_s (\Omega \cdot \text{cm}^{-2})$ | $R_p (\Omega \cdot \text{cm}^{-2})$ | $L (\Omega \cdot \text{cm}^{-2})$ |
|---------------|-------------------------------------|-------------------------------------|-----------------------------------|
| Blank         | 30                                  | 2235                                | 50                                |
| Zif-8 coating | 70                                  | 4010                                | 12                                |
